# Supplementary material for: Recombinant prion protein vaccination of transgenic elk PrP mice and reindeer overcomes self-tolerance and protects mice against chronic wasting disease
Source: PubMed Central journal article supplement (PMC6314114; doi:10.1074/jbc.ra118.004810), 2018-11-05
Supplement: supp_RA118.004810_139334_2_supp_229228_phqfhj.pdf [file supp_RA118.004810_139334_2_supp_229228_phqfhj.pdf]

**Recombinant prion protein vaccination of transgenic elk PrP mice and reindeer overcomes self-tolerance and protects mice against chronic wasting disease**

Dalia H. Abdelaziz, Simrika Thapa, Jenna Brandon, Justine Maybee, Lauren Vankuppeveld, Robert McCorkell and Hermann M. Schatzl

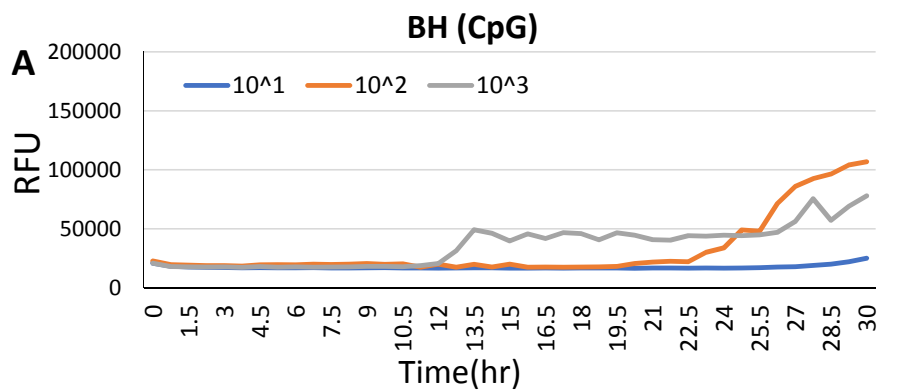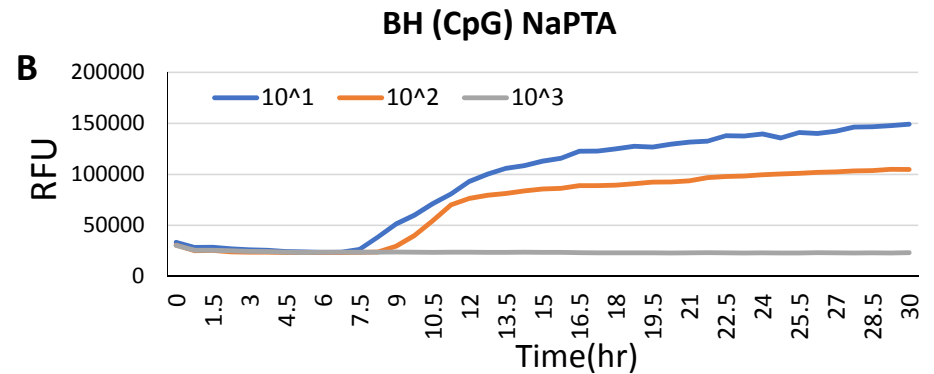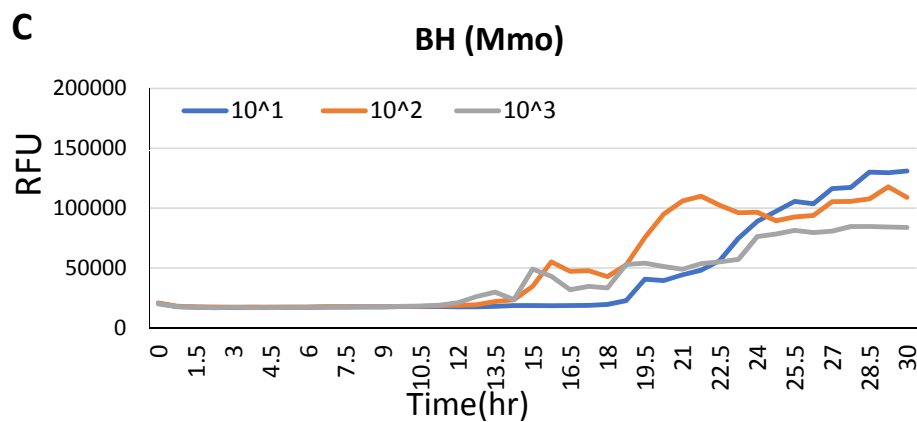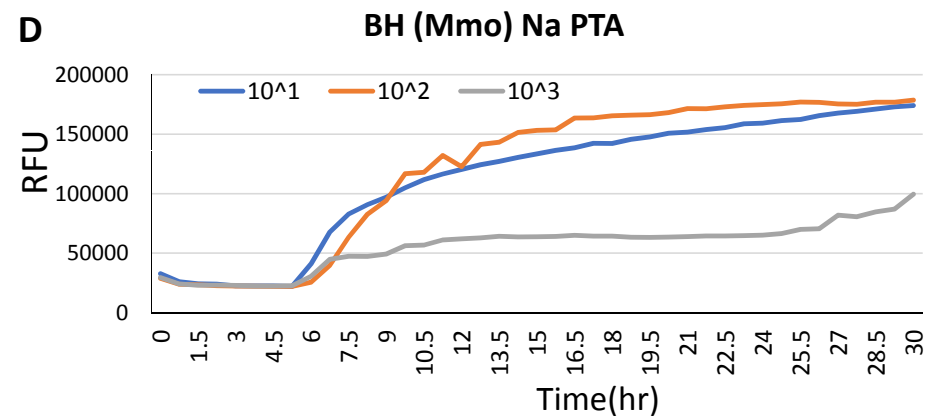

**Supplementary Fig 1:** Prion conversion activity in brain homogenates of intraperitoneally inoculated TgElk mice. (A) RT-QuIC expressed as relative fluorescence units (RFU) per hour in which the seed was 10% homogenate of a terminally ill CWD-infected CpG control TgElk mouse. (B) RT-QuIC in which the seed was 10% homogenate of the same mouse in panel A enriched by sodium phospho-tungstic acid (Na PTA) precipitation. (C) RT-QuIC in which the seed was 10% homogenate of a terminally ill CWD-infected Mmo-vaccinated TgElk mouse. (D) RT-QuIC in which the seed was 10% homogenate of the same mouse in panel C enriched with sodium phospho-tungstic acid (Na PTA) precipitation. Mouse rPrP was used as substrate for the reactions, three tenfold dilutions of seed were analyzed ( $10^{-1}$  to  $10^{-3}$ ), and each curve represents the average of 4 technical replicates.

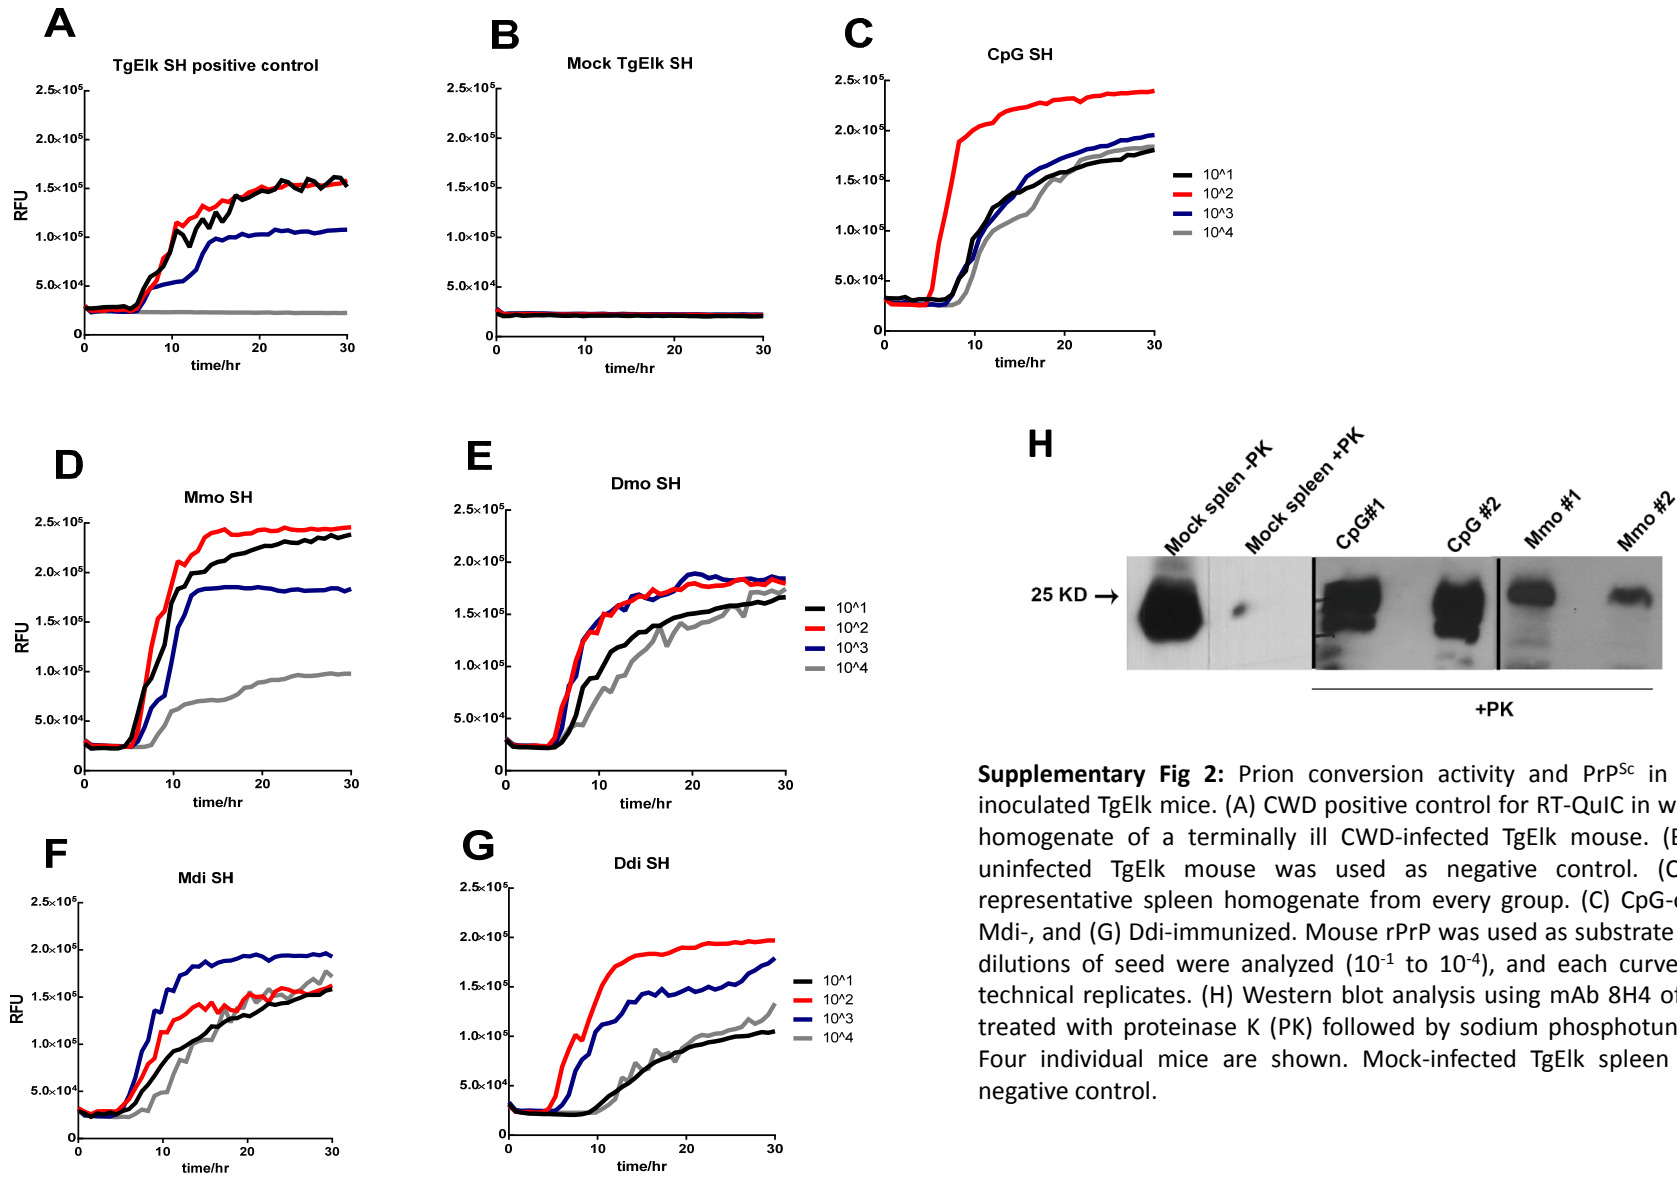

**Supplementary Fig 2:** Prion conversion activity and PrP<sup>Sc</sup> in spleen homogenates of i.p.-inoculated TgElk mice. (A) CWD positive control for RT-QuIC in which the seed was 10% spleen homogenate of a terminally ill CWD-infected TgElk mouse. (B) Spleen homogenate of an uninfected TgElk mouse was used as negative control. (C-G) RT-QuIC assay for one representative spleen homogenate from every group. (C) CpG-only, (D) Mmo-, (E) Dmo-, (F) Mdi-, and (G) Ddi-immunized. Mouse rPrP was used as substrate for the reactions, four tenfold dilutions of seed were analyzed ( $10^{-1}$  to  $10^{-4}$ ), and each curve represents the average of 4 technical replicates. (H) Western blot analysis using mAb 8H4 of spleen homogenate samples treated with proteinase K (PK) followed by sodium phosphotungstic acid (NPTA) enrichment. Four individual mice are shown. Mock-infected TgElk spleen homogenate was used as a negative control.
